# Supplementary figures and images for: Synthesis and Optimization of a Free-Radical/Cationic Hybrid Photosensitive UV Curable Resin Using Polyurethane Acrylate and Graphene Oxide
Source: MDPI journal article supplement (doi:10.3390/polym14101959), 2022-05-12

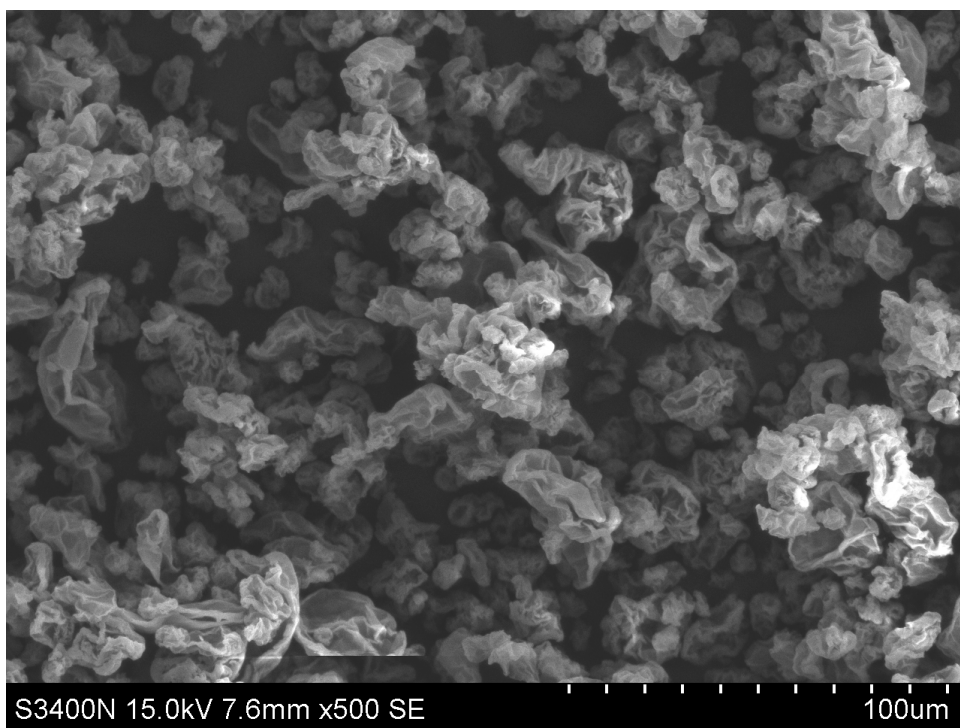

**Figure S1.** SEM of Powdered GO.

Supplement: s1 [file s1]
